# Supplementary material for: Systematic comparison with autoimmune liver disease identifies specific histological features of immune checkpoint inhibitor-related adverse events
Source: PubMed Central journal article supplement — J Immunother Cancer. 2022 Oct 25;10(10):e005635. doi: 10.1136/jitc-2022-005635 (PMC9608549; doi:10.1136/jitc-2022-005635), 2022-10-25
Supplement: jitc-2022-005635supp001.pdf [file jitc-2022-005635supp001.pdf]

| Patient number | Gender, Age (years), Cancer type                 | Immune checkpoint inhibitor molecule                          | Other concomitant irAEs                          | Latency of toxicity (weeks) | ALT Peak (IU/L) | AST / ALT | Total Bilirubin Peak (μmol/L) | Alkaline Phosphatase Peak (IU/L) | Clinical phenotype | Delay for immunosuppression (in weeks) | Immunosuppressive therapy                |
|----------------|--------------------------------------------------|---------------------------------------------------------------|--------------------------------------------------|-----------------------------|-----------------|-----------|-------------------------------|----------------------------------|--------------------|----------------------------------------|------------------------------------------|
| 1              | Male in his 70s<br>Mesothelioma                  | Anti-CTLA-4 <sup>1</sup> / anti-PD-1 <sup>2</sup> combination | Rash                                             | 7                           | 662             | 0.33      | 16                            | 110                              | IrH                | 5                                      | Corticosteroids 2mg/kg, MMF              |
| 2              | Male in his 50s,<br>Renal cell carcinoma         | Anti-CTLA-4 <sup>1</sup> / anti-PD-1 <sup>2</sup> combination | None                                             | 3                           | 294             | 0.54      | 17                            | 133                              | IrH                | 3                                      | Corticosteroids 1mg/kg                   |
| 3              | Male in his 60s,<br>Melanoma                     | Anti-CTLA-4 <sup>1</sup> / anti-PD-1 <sup>2</sup> combination | None                                             | 8                           | 456             | 0.56      | 9                             | 373                              | IrH                | 2                                      | Corticosteroids 1mg/kg, MMF              |
| 4              | Female in her 40s,<br>Melanoma                   | Anti-PD-1 <sup>3</sup>                                        | Thyroiditis,<br>hypophysitis                     | 1                           | 384             | 0.67      | 11                            | 123                              | IrH                | 2                                      | Corticosteroids 1mg/kg                   |
| 5              | Male in his 70s,<br>Melanoma                     | Anti-PD-1 <sup>3</sup>                                        | Pleuritis, colitis,<br>hypophysitis,<br>vitiligo | 23                          | 1121            | 0.59      | 20                            | 504                              | IrH                | 5                                      | Corticosteroids 1mg/kg, MMF              |
| 6              | Male in his 30s,<br>Melanoma                     | Anti-CTLA-4 <sup>1</sup> / anti-PD-1 <sup>2</sup> combination | None                                             | 8                           | 1224            | 0.43      | 63                            | 186                              | IrH                | 3                                      | Corticosteroids 2mg/kg, MMF, Tocilizumab |
| 7              | Female in her 60s,<br>Small cell lung carcinoma  | Anti-CTLA-4 <sup>1</sup> / anti-PD-1 <sup>2</sup> combination | Thyroiditis                                      | 12                          | 948             | 0.71      | 14                            | 205                              | IrH                | No immunosuppression                   | None                                     |
| 8              | Female in her 60s,<br>Uveal melanoma             | Anti-CTLA-4 <sup>1</sup> / anti-PD-1 <sup>2</sup> combination | Thyroiditis                                      | 10                          | 1630            | 0.6       | 76                            | 374                              | IrH                | 0                                      | Corticosteroids 2mg/kg, MMF, Infliximab  |
| 9              | Female in her 20s,<br>Uveal melanoma             | Anti-CTLA-4 <sup>1</sup> / anti-PD-1 <sup>2</sup> combination | None                                             | 3                           | 773             | 1.89      | 37                            | 743                              | IrCH               | 3                                      | Dexamethasone 16mg/day                   |
| 10             | Male in his 50s,<br>Melanoma                     | Anti-CTLA-4 <sup>1</sup> / anti-PD-1 <sup>2</sup> combination | Neuropathy                                       | 6                           | 1486            | 0.59      | 21                            | 242                              | IrH                | 0                                      | Corticosteroids 2mg/kg, MMF              |
| 11             | Male in his 60s,<br>Squamous cell lung carcinoma | Anti-PD-1 <sup>2</sup>                                        | Vitiligo                                         | 4                           | 572             | 0.46      | 28                            | 520                              | IrCH               | 3                                      | Corticosteroids 2mg/kg, MMF              |
| 12             | Male in his 80s,<br>Melanoma                     | Anti-PD-1 <sup>3</sup>                                        | None                                             | 6                           | 695             | 2.05      | 289                           | 727                              | IrCH               | 0                                      | Corticosteroids 1mg/kg, MMF              |
| 13             | Female in her 60s,<br>Lung adenocarcinoma        | Anti-PD-1 <sup>3</sup>                                        | None                                             | 6                           | 125             | 0.7       | 41                            | 1395                             | IrC                | No immunosuppression                   | None                                     |

|    |                                               |                                                               |                                                   |    |      |      |     |      |                                  |                                                  |                                     |
|----|-----------------------------------------------|---------------------------------------------------------------|---------------------------------------------------|----|------|------|-----|------|----------------------------------|--------------------------------------------------|-------------------------------------|
| 14 | Male in his 40s, Melanoma                     | Anti-CTLA-4 <sup>1</sup> / anti-PD-1 <sup>2</sup> combination | Adrenal insufficiency, rash, colitis, thyroiditis | 10 | 261  | 1.03 | 11  | 371  | IrH                              | 2                                                | Corticosteroids 1mg/kg, Infliximab  |
| 15 | Female in her 60s, Serous-type ovarian cancer | Anti-PD-L1 <sup>4</sup>                                       | None                                              | 32 | 190  | 0.72 | 7   | 45   | IrH                              | 1                                                | Corticosteroids 1mg/kg              |
| 16 | Male in his 70s, Prostate adenocarcinoma      | Anti-CTLA-4 <sup>1</sup> / anti-PD-1 <sup>2</sup> combination | Colitis, thyroiditis                              | 26 | 167  | 0.85 | 10  | 385  | IrC                              | 0                                                | Corticosteroids 1mg/kg, Infliximab  |
| 17 | Female in her 50s, Melanoma                   | Anti-PD-1 <sup>2</sup>                                        | Thyroiditis                                       | 72 | 569  | 0.5  | 11  | 510  | IrH followed by IrC <sup>+</sup> | 24                                               | Corticosteroids 2mg/kg              |
| 18 | Male in his 60s, Prostate adenocarcinoma      | Anti-CTLA-4 <sup>1</sup> / anti-PD-1 <sup>2</sup> combination | None                                              | 10 | 371  | 0.58 | 12  | 356  | IrH                              | 0                                                | Corticosteroids 1mg/kg              |
| 19 | Female in her 60s, Melanoma                   | Anti-CTLA-4 <sup>1</sup> / anti-PD-1 <sup>2</sup> combination | Thyroiditis, adrenal insufficiency, rash          | 5  | 283  | 1.08 | 16  | 610  | IrCH                             | 3                                                | Corticosteroids 2mg/kg              |
| 20 | Female in her 70s, Melanoma                   | Anti-CTLA-4 <sup>1</sup> / anti-PD-1 <sup>2</sup> combination | None                                              | 30 | 276  | 0.67 | 11  | 288  | IrC                              | 1                                                | Corticosteroids 1mg/kg, MMF         |
| 21 | Female in her 60s, Uveal melanoma             | Anti-CTLA-4 <sup>1</sup> / anti-PD-1 <sup>2</sup> combination | Rash                                              | 4  | 132  | 1.09 | 26  | 144  | IrH                              | No immunosuppression                             | None                                |
| 22 | Male in his 80s, Squamous cell lung carcinoma | Anti-PD-1 <sup>3</sup>                                        | Nephritis                                         | 10 | 655  | 1.33 | 54  | 969  | IrCH                             | 1                                                | Corticosteroids 2mg/kg, Tocilizumab |
| 23 | Male in his 40s, Melanoma                     | Anti-PD-1 <sup>3</sup>                                        | Thyroiditis                                       | 49 | 855  | 0.18 | 18  | 177  | IrH                              | 2                                                | Dexamethasone 4mg/day               |
| 24 | Male in his 60s, Squamous cell lung carcinoma | Anti-PD-1 <sup>3</sup>                                        | None                                              | 19 | 331  | 0.53 | 178 | 1018 | IrC                              | 2                                                | Corticosteroids 2mg/kg, Tocilizumab |
| 25 | Female in her 70s, Cholangiocarcinoma         | Anti-CTLA-4 <sup>1</sup> / anti-PD-1 <sup>2</sup> combination | Thyroiditis                                       | 4  | 210  | 1.16 | 10  | 274  | IrCH                             | 2                                                | Corticosteroids 1mg/kg              |
| 26 | Female in her 60s, Lung adenocarcinoma        | Anti-PD-1 <sup>3</sup>                                        | None                                              | 2  | 1623 | 0.34 | 89  | 724  | IrCH                             | 2                                                | Corticosteroids 1mg/kg, Tocilizumab |
| 27 | Male in his 70s, Urothelial carcinoma         | Anti-PD-1 <sup>3</sup>                                        | Pneumonitis, nephritis                            | 55 | 145  | 0.69 | 22  | 266  | IrCH                             | Given 1 week before ALT increase for pneumonitis | Corticosteroids 1mg/kg, Tocilizumab |

**Supplementary Table 1. Clinical and biological characteristics of each irH and irC patient.**

Description of each ICI patient, from their demographic and oncological data to their main laboratory values and immunosuppressive regimen. Patients 9 and 12 are in grey as these patients' biopsies were unreadable due to ischemic hepatitis and presence of radioembolic beads after SIRT.

<sup>1</sup> Ipilimumab; <sup>2</sup> Nivolumab; <sup>3</sup> Pembrolizumab; <sup>4</sup> Durvalumab

\* Patient 17 received her immunotherapy two years prior to liver biopsy. She first developed irH one month following her immunotherapy. Two years later she developed irC without having received any additional immunotherapy and was biopsied at that point.

*ALT, alanine aminotransferase; AST, aspartate aminotransferase; CTLA-4, cytotoxic T-lymphocyte associated protein 4; irAE, immune-related adverse event; irC, immune-related cholangitis; irCH, immune-related cholangiohepatitis; irH, immune-related hepatitis; MMF, mycophenolate mofetil; PD-1, programmed cell death 1; PD-L1, programmed cell death ligand 1; SIRT, selective internal radiation therapy.*

| Patient | ICI                                                 | ALT Peak (U/l) | ALP Peak (U/l) | Total Bilirubin Peak ( $\mu\text{mol/l}$ ) | Clinical Phenotype                | Serological Markers                                                                            | Histological Pattern                                       |
|---------|-----------------------------------------------------|----------------|----------------|--------------------------------------------|-----------------------------------|------------------------------------------------------------------------------------------------|------------------------------------------------------------|
| 9       | Anti-CTLA-4 <sup>1</sup> and anti-PD-1 <sup>2</sup> | 773            | 743            | 37                                         | Hepatitis                         | IgG 15.3 g/l<br>ANA 1/160<br>SMA 1/160<br>Anti-actin 29 U/l                                    | Acute portal and lobular hepatitis                         |
| 14      | Anti-CTLA-4 <sup>1</sup> and anti-PD-1 <sup>2</sup> | 261            | 371            | 11                                         | Hepatitis                         | IgG NA<br>ANA 1/80<br>SMA 1/160<br>Anti-actin 40 U/l                                           | Acute portal and lobular hepatitis                         |
| 17      | Anti-PD-1 <sup>2</sup>                              | 569            | 510            | 11                                         | Hepatitis followed by cholangitis | IgG 14 g/l<br>ANA 1/640<br>SMA 1/640<br>Anti-actin 108 U/l<br>IgM 2.94 g/l<br>Positive anti-M2 | PBC like pattern                                           |
| 22      | Anti-PD-1 <sup>3</sup>                              | 655            | 969            | 54                                         | Mixed pattern                     | IgG 10 g/l<br>ANA 1/320<br>Negative SMA<br>anti-actin 27 U/l                                   | Chronic portal hepatitis with biliary obstruction features |

**Supplementary Table 2. Biological and histopathological characteristics of ICI patients presenting with elevated serological markers for autoimmune liver disease.**

<sup>1</sup> Ipilimumab; <sup>2</sup> Nivolumab; <sup>3</sup> Pembrolizumab

*ALP, alkaline phosphatase; ALT, alanine aminotransferase; ANA, anti-nuclear antibody; SMA, smooth muscle antibody; CTLA-4, cytotoxic T-lymphocyte associated protein 4; ICI, immune checkpoint inhibitor; IgG, immunoglobulin G; IgM, immunoglobulin M; INR, international normalized ratio; irAE, immune-related adverse event; irC, immune-related cholangitis; irH, immune-related hepatitis; PBC, primary biliary cirrhosis; PD-1, programmed cell death 1.*

| Patient | Gender, Age (years) | Disease                     | History of Autoimmune Disease          | Increased IgGs | Presence of anti-Smooth Muscle antibodies | Presence of other autoantibodies       | ALT Peak | AST/ALT | Bilirubin Peak | GGT Peak | Alkaline Phosphatase Peak | Treatment                                              |
|---------|---------------------|-----------------------------|----------------------------------------|----------------|-------------------------------------------|----------------------------------------|----------|---------|----------------|----------|---------------------------|--------------------------------------------------------|
| 1       | Female in her 40s   | Autoimmune Hepatitis        | Graves' disease                        | yes            | + 1/640                                   | Anti-actin: 78 U                       | 757      | 0.7     | 125            | 52       | 124                       | Corticosteroids, Azathioprine (intolerant), MMF 2g/day |
| 2       | Female in her 60s   | Autoimmune Hepatitis        | none                                   | yes            | + 1/80                                    | Anti-actin: 31 U                       | 1944     | 0.7     | 359            | 969      | 431                       | Corticosteroids 1mg/kg/day, Azathioprine               |
| 3       | Female in her 40s   | Autoimmune Hepatitis        | Type 1 diabetes                        | yes            | + 1/5120                                  | Anti-actin: 109 U                      | 210      | 1.1     | 10             | 186      | 125                       | Corticosteroids, Azathioprine, MMF 2g/day              |
| 4       | Female in her 50s   | Autoimmune Hepatitis        | Autoimmune thyroiditis, DRESS syndrome | yes            | + 1/80                                    | Negative anti-actin, Positive anti-SLA | 1098     | 0.7     | 53             | 607      | 164                       | Corticosteroids 1mg/kg/day, Azathioprine               |
| 5       | Female in her 60s   | Autoimmune Hepatitis        | none                                   | yes            | + 1/640                                   | Anti-actin 61 U                        | 1895     | 0.4     | 327            | 500      | 153                       | Corticosteroids, MMF 1g/day                            |
| 6       | Female in her 20s   | Autoimmune Hepatitis        | Graves' disease                        | yes            | + 1/80                                    | Anti-actin 15 U                        | 1437     | 0.7     | 345            | 106      | 142                       | Corticosteroids 1mg/kg/day, Azathioprine               |
| 7       | Female in her 30s   | Autoimmune Hepatitis        | none                                   | yes            | none                                      | Anti-actin 64 U                        | 3301     | 0.9     | 388            | 87       | 116                       | Corticosteroids 1mg/kg/day, Azathioprine               |
| 8       | Female in her 70s   | Autoimmune Hepatitis        | none                                   | no             | + 1/80                                    | Anti-actin 34 U                        | 198      | 0.7     | 44             | 289      | 185                       | Corticosteroids 1mg/kg/day, Azathioprine               |
| 9       | Female in her 50s   | Autoimmune Hepatitis        | Lymphocytic colitis                    | yes            | + 1/5120                                  | Anti-actin 124 U                       | 165      | 0.8     | 33             | 120      | 190                       | Corticosteroids, Azathioprine, MMF 1.44g/day           |
| 10      | Male in his 50s     | Autoimmune Hepatitis        | none                                   | no             | + 1/320                                   | Anti-actin 42 U                        | 707      | 0.2     | 54             | 546      | 167                       | Corticosteroids 1mg/kg/day, Azathioprine               |
| 11      | Female in her 20s   | Autoimmune Hepatitis        | Rheumatoid polyarthritis               | yes            | + 1/2560                                  | Anti-actin 123 U                       | 285      | 0.5     | 11             | 90       | 242                       | Corticosteroids 1mg/kg/day, Azathioprine               |
| 12      | Female in her 40s   | Primary Biliary Cholangitis | Rheumatoid polyarthritis               | no             | none                                      | Positive anti-mitochondria and anti-M2 | 49       | 0.8     | 5              | 167      | 240                       | Ursodeoxycholic acid 15mg/kg                           |
| 13      | Female in her 40s   | Primary Biliary Cholangitis | none                                   | no             | none                                      | Positive anti-mitochondria and anti-M2 | 80       | 0.6     | 11             | 339      | 330                       | Ursodeoxycholic acid 15mg/kg                           |
| 14      | Female in her 60s   | Primary Biliary Cholangitis | Rheumatoid polyarthritis               | yes            | none                                      | Positive anti-mitochondria and anti-M2 | 74       | 0.6     | 7              | 101      | 250                       | Ursodeoxycholic acid 15mg/kg                           |

**Supplementary Table 3. Clinical and biological characteristics of AIH and PBC patients**

Description of each AIH and PBC patient. Eleven patients were diagnosed with AIH and three with PBC.

*AIH, autoimmune hepatitis; ALT, alanine aminotransferase; AST, aspartate aminotransferase; DRESS, drug rash with eosinophilia and systemic symptoms; GGT, gamma-glutamyltransferase; IgG, immunoglobulin G; MMF, mycophenolate mofetil; PBC, primary biliary cholangitis; SLA, soluble liver antigen.*

| Patient | Lesional Pattern                                        | Portal inflammation (0-3) | Interface hepatitis (0-3) | Bile duct injury (0-1) | Ductular reaction (0-3) | Biliary metaplasia (0-3) | Lobular inflammation (0-3) | Lobular necrosis (0-3) | Emperiopolesis (0-1) | Rosettes (0-1) | Granulomas (0-2) | Bilirubino-stasis (0-1) | Centrilobular injury (0-3) | Severity score | Plasma cells (0-2) | Eosinophils (0-2) | Neutrophils (0-2) | Fibrosis (METAVIR) | CD4/CD8 (ratio) |
|---------|---------------------------------------------------------|---------------------------|---------------------------|------------------------|-------------------------|--------------------------|----------------------------|------------------------|----------------------|----------------|------------------|-------------------------|----------------------------|----------------|--------------------|-------------------|-------------------|--------------------|-----------------|
| 1       | Lobular hepatitis                                       | 1                         | 0                         | 0                      | 1                       | 0                        | 2                          | 2                      | 0                    | 0              | 0                | 0                       | 3                          | 8              | 1                  | 0                 | 1                 | F1                 | -               |
| 2       | Portal and lobular hepatitis with underlying NASH       | 1                         | 1                         | 0                      | 1                       | 1                        | 1                          | 0                      | 0                    | 0              | 1                | 0                       | 0                          | 3              | 1                  | 1                 | 1                 | F1                 | >1              |
| 3       | Lobular hepatitis                                       | 1                         | 0                         | 0                      | 1                       | 1                        | 2                          | 1                      | 0                    | 0              | 0                | 0                       | 2                          | 6              | 1                  | 1                 | 1                 | F1                 | <1              |
| 4       | Portal hepatitis                                        | 2                         | 2                         | 1                      | 2                       | 0                        | 0                          | 1                      | 0                    | 0              | 0                | 0                       | 0                          | 5              | 1                  | 0                 | 1                 | F2                 | <1              |
| 5       | Mild portal hepatitis                                   | 1                         | 0                         | 0                      | 0                       | 0                        | 0                          | 0                      | 0                    | 0              | 0                | 0                       | 0                          | 1              | 0                  | 0                 | 0                 | F1                 | 1               |
| 6       | Portal and lobular hepatitis                            | 2                         | 1                         | 0                      | 0                       | 0                        | 3                          | 1                      | 0                    | 0              | 1                | 0                       | 1                          | 8              | 1                  | 1                 | 1                 | F0                 | -               |
| 7       | Portal and lobular hepatitis                            | 2                         | 1                         | 1                      | 2                       | 0                        | 2                          | 2                      | 0                    | 0              | 2                | 0                       | 1                          | 8              | 1                  | 2                 | 1                 | F0                 | >1              |
| 8       | Portal and lobular hepatitis                            | 3                         | 3                         | 1                      | 1                       | 0                        | 3                          | 2                      | 0                    | 0              | 2                | 0                       | 2                          | 13             | 1                  | 2                 | 1                 | F0                 | <1              |
| 10      | Portal and lobular hepatitis                            | 1                         | 1                         | 0                      | 1                       | 0                        | 2                          | 2                      | 0                    | 0              | 1                | 0                       | 1                          | 7              | 1                  | 0                 | 1                 | F1                 | 1               |
| 11      | Portal hepatitis with biliary obstruction features      | 2                         | 1                         | 1                      | 2                       | 1                        | 1                          | 1                      | 0                    | 0              | 0                | 0                       | 1                          | 6              | 1                  | 0                 | 2                 | F2                 | <1              |
| 13      | Mild portal hepatitis with biliary obstruction features | 1                         | 0                         | 1                      | 2                       | 0                        | 1                          | 0                      | 0                    | 0              | 0                | 0                       | 0                          | 2              | 0                  | 1                 | 1                 | F1                 | 1               |
| 14      | Portal and lobular hepatitis                            | 3                         | 3                         | 1                      | 1                       | 1                        | 2                          | 2                      | 0                    | 0              | 2                | 0                       | 1                          | 11             | 2                  | 2                 | 2                 | F1                 | 1               |
| 15      | Lobular hepatitis                                       | 1                         | 0                         | 0                      | 0                       | 0                        | 1                          | 1                      | 0                    | 0              | 1                | 0                       | 0                          | 3              | 0                  | 1                 | 0                 | F0                 | 1               |

|    |                                                            |   |   |   |   |   |   |   |   |   |   |   |   |   |   |   |   |       |    |
|----|------------------------------------------------------------|---|---|---|---|---|---|---|---|---|---|---|---|---|---|---|---|-------|----|
| 16 | Portal hepatitis with biliary obstruction features         | 2 | 0 | 1 | 2 | 1 | 0 | 0 | 0 | 0 | 0 | 0 | 0 | 2 | 0 | 1 | 2 | F1    | 1  |
| 17 | Primary biliary cholangitis                                | 2 | 1 | 1 | 2 | 2 | 1 | 1 | 0 | 0 | 1 | 0 | 0 | 5 | 1 | 1 | 2 | F1    | 1  |
| 18 | Portal hepatitis                                           | 3 | 3 | 1 | 1 | 0 | 1 | 1 | 0 | 0 | 1 | 0 | 0 | 8 | 0 | 2 | 1 | F1    | 1  |
| 19 | Portal and lobular hepatitis                               | 2 | 1 | 1 | 2 | 0 | 2 | 1 | 0 | 0 | 1 | 0 | 0 | 6 | 0 | 2 | 2 | F1    | 1  |
| 20 | Primary biliary cholangitis                                | 2 | 1 | 1 | 2 | 0 | 1 | 1 | 0 | 0 | 1 | 0 | 0 | 5 | 1 | 1 | 1 | F1    | >1 |
| 21 | Portal and lobular hepatitis                               | 1 | 1 | 0 | 1 | 0 | 2 | 2 | 0 | 1 | 1 | 0 | 1 | 7 | 0 | 0 | 0 | F1    | 1  |
| 22 | Portal hepatitis with biliary obstruction features         | 2 | 2 | 1 | 2 | 1 | 1 | 1 | 0 | 0 | 0 | 1 | 0 | 6 | 1 | 1 | 2 | F1    | 1  |
| 23 | Other <sup>5</sup>                                         | 0 | 0 | 0 | 0 | 0 | 0 | 0 | 0 | 0 | 0 | 0 | 0 | 0 | 0 | 0 | 0 | F0    | 1  |
| 24 | Biliary obstruction features                               | 1 | 1 | 1 | 3 | 3 | 1 | 1 | 0 | 0 | 0 | 1 | 0 | 4 | 0 | 0 | 2 | F2/F3 | 1  |
| 25 | Portal hepatitis with primary biliary cholangitis features | 3 | 2 | 1 | 2 | 2 | 1 | 1 | 0 | 0 | 0 | 0 | 0 | 7 | 1 | 2 | 2 | F2    | >1 |
| 26 | Primary biliary cholangitis                                | 3 | 1 | 1 | 2 | 0 | 1 | 1 | 0 | 0 | 1 | 0 | 0 | 6 | 1 | 2 | 2 | F1    | >1 |
| 27 | Portal hepatitis with biliary obstructions features        | 2 | 1 | 1 | 3 | 3 | 1 | 1 | 0 | 0 | 0 | 0 | 0 | 5 | 1 | 1 | 1 | F2/3  | >1 |

**Supplementary Table 4. Histopathology and immunohistochemistry of irH and irC**

Description of each patient in the ICI group.

<sup>1</sup> Ipilimumab; <sup>2</sup> Nivolumab; <sup>3</sup> Pembrolizumab; <sup>4</sup> Durvalumab

<sup>5</sup> Biological and clinical characteristics of irH, though liver biopsy predominantly showed macrovesicular steatosis.

*CD4*, cluster of differentiation 4; *CD8*, cluster of differentiation 8; *CTLA-4*, cytotoxic T-lymphocyte associated protein 4; *F*, fibrosis; *irC*, immune-related cholangitis; *irH*, immune-related hepatitis; *NASH*, non-alcoholic steatohepatitis; *PD-1*, programmed cell death 1, *PD-L1*, programmed cell death ligand 1.

| Patient | Disease                     | Lesional Pattern                                                   | Portal inflammation (0-3) | Interface hepatitis (0-3) | Bile duct injury (0-1) | Ductular reaction (0-3) | Biliary metaplasia (0-3) | Lobular inflammation (0-3) | Lobular necrosis (0-3) | Emperipolesis (0-1) | Rosettes (0-1) | Granulomas (0-1) | Bilirubinostasis (0-1) | Centri-lobular injury (0-3) | Plasma cells (0-2) | Eosinophils/neutrophils (0-1) | Fibrosis (METAVIR) | CD4-CD8 (ratio) |
|---------|-----------------------------|--------------------------------------------------------------------|---------------------------|---------------------------|------------------------|-------------------------|--------------------------|----------------------------|------------------------|---------------------|----------------|------------------|------------------------|-----------------------------|--------------------|-------------------------------|--------------------|-----------------|
| 1       | Autoimmune hepatitis        |                                                                    |                           |                           |                        |                         |                          |                            |                        |                     |                |                  |                        |                             |                    |                               |                    |                 |
| 2       | Autoimmune hepatitis        | Portal and lobular hepatitis                                       | 3                         | 3                         | 1                      | 2                       | 0                        | 3                          | 3                      | 1                   | 1              | 0                | 1                      | 0                           | 1                  | 1/2                           | F2                 | -               |
| 3       | Autoimmune hepatitis        | Portal and lobular hepatitis                                       | 3                         | 3                         | 1                      | 2                       | 1                        | 2                          | 2                      | 0                   | 0              | 0                | 0                      | 0                           | 2                  | 1/1                           | F2                 | >1              |
| 4       | Autoimmune hepatitis        | Portal and lobular hepatitis                                       | 3                         | 3                         | 0                      | 2                       | 0                        | 2                          | 1                      | 0                   | 1              | 0                | 1                      | 0                           | 2                  | 1/1                           | F0                 | -               |
| 5       | Autoimmune hepatitis        | Portal and lobular hepatitis                                       | 3                         | 2                         | 0                      | 2                       | 0                        | 2                          | 2                      | 1                   | 1              | 0                | 0                      | 0                           | 2                  | 1/1                           | F2                 | -               |
| 6       | Autoimmune hepatitis        | Portal and lobular hepatitis                                       | 3                         | 2                         | 0                      | 2                       | 0                        | 3                          | 2                      | 1                   | 1              | 0                | 0                      | 0                           | 2                  | 1/2                           | F2                 | >1              |
| 7       | Autoimmune hepatitis        | Portal and lobular hepatitis                                       | 2                         | 1                         | 0                      | 2                       | 1                        | 1                          | 1                      | 0                   | 0              | 0                | 0                      | 1                           | 1                  | 1/2                           | F3/F4              | >1              |
| 8       | Autoimmune hepatitis        | Mild portal and lobular hepatitis                                  | 1                         | 0                         | 0                      | 0                       | 0                        | 1                          | 1                      | 0                   | 0              | 0                | 0                      | 0                           | 1                  | 0/0                           | F0                 | 1               |
| 9       | Autoimmune hepatitis        | Macrovacuolar steatosis with moderate portal and lobular hepatitis | 2                         | 2                         | 1                      | 2                       | 1                        | 1                          | 1                      | 1                   | 0              | 0                | 0                      | 0                           | 2                  | 1/1                           | F1                 | 1               |
| 10      | Autoimmune hepatitis        | Portal and lobular hepatitis                                       | 3                         | 2                         | 0                      | 1                       | 0                        | 2                          | 2                      | 1                   | 0              | 0                | 0                      | 1                           | 2                  | 2/2                           | F2                 | >1              |
| 11      | Autoimmune hepatitis        | Mild portal hepatitis                                              | 1                         | 0                         | 0                      | 0                       | 0                        | 1                          | 0                      | 0                   | 0              | 0                | 0                      | 0                           | 1                  | 0/0                           | F0                 | 1               |
| 12      | Primary biliary cholangitis | Mild portal hepatitis                                              | 1                         | 0                         | 0                      | 0                       | 0                        | 0                          | 0                      | 0                   | 0              | 0                | 0                      | 0                           | 1                  | 0/0                           | F1                 | >1              |
| 13      | Primary biliary cholangitis | Biliary lesions with ductopenia                                    | 1                         | 1                         | 1                      | 1                       | 3                        | 1                          | 0                      | 0                   | 0              | 0                | 0                      | 0                           | 0                  | 0/0                           | F2                 | -               |
| 14      | Primary biliary cholangitis | Inflammatory biliary lesions                                       | 1                         | 0                         | 1                      | 0                       | 0                        | 0                          | 0                      | 0                   | 0              | 0                | 0                      | 0                           | 2                  | 0/0                           | F0                 | -               |

**Supplementary Table 5. Histopathology and immunohistochemistry of AIH and PBC**

Description of AIH and PBC patients.

AIH, autoimmune hepatitis; CD4, cluster of differentiation 4; CD8, cluster of differentiation 8; F, fibrosis; PBC, primary biliary cholangitis.
